# Supplementary material
Source: PubMed Central journal article supplement (PMC7364715)
Supplement: ao0c01762_si_001.pdf [file ao0c01762_si_001.pdf]

# Supporting Information

## “The Hepatitis B Virus oncoprotein HBx is *not* an ATPase”

*Michelle Langton and Maria E. Pandelia\**

Department of Biochemistry, Brandeis University, Waltham, MA 02453

*AUTHOR EMAIL ADDRESS:* [mepandelia@brandeis.edu](mailto:mepandelia@brandeis.edu)

### **ACKNOWLEDGEMENTS**

**Funding.** This work has been supported by the National Institutes of Health (GM111978 and GM126303 to M.-E.P.).

**Table S1.** Primers used for the generation of the MBP-HBx variants

| <b>Mutation</b> | <b>Forward primer</b>      | <b>Reverse Primer</b> |
|-----------------|----------------------------|-----------------------|
| G136A           | CGTTCTGGGTGCTTGCCGTCATAAAC | AACACCTTCAGACGAATTTTC |
| K130A           | CGTCTGGCAGTGTTTCGTT        | AATTTCTCGCCCAGTTCC    |
| K140A           | GCCGTCATGCACTGGTGT         | AGCCACCCAGAACGAACA    |
| C137A           | CAGCAGTTCAATGCATTTCTC      | AGTTTGTGACGCGCGCCAC   |
| H139A           | GCTGCCGTGCAAAACTGG         | CACCCAGAACGAACACCT    |
| K130M           | CGTCTGATGGTGTTTCGTTTC      | AATTTCTCGCCCAGTTCCC   |
| V131I           | TCGTCTGATGATCTTCGTTCTGGGTG | ATTTCTCGCCCAGTTCC     |
| $\Delta$ 27     | TAACTCGAGCACCACCACCAC      | AATTTCTCGCCCAGTTCTC   |

**Table S2.** NSitePred nucleotide binding prediction.

| <b>AA</b> | <b>#</b> | <b>ATP<br/>binding<br/>res.</b> | <b>ATP<br/>prob.</b> | <b>ADP<br/>binding<br/>res.</b> | <b>ADP<br/>prob.</b> | <b>AMP<br/>binding<br/>res.</b> | <b>AMP<br/>prob.</b> | <b>GTP<br/>binding<br/>res.</b> | <b>GTP<br/>prob.</b> | <b>GDP<br/>binding<br/>res.</b> | <b>GDP<br/>prob.</b> |
|-----------|----------|---------------------------------|----------------------|---------------------------------|----------------------|---------------------------------|----------------------|---------------------------------|----------------------|---------------------------------|----------------------|
| M         | 1        | N                               | 0.025                | N                               | 0.025                | N                               | 0.024                | N                               | 0.021                | N                               | 0.017                |
| A         | 2        | N                               | 0.026                | N                               | 0.022                | N                               | 0.024                | N                               | 0.025                | N                               | 0.016                |
| A         | 3        | N                               | 0.03                 | N                               | 0.022                | N                               | 0.025                | N                               | 0.024                | N                               | 0.013                |
| R         | 4        | N                               | 0.041                | N                               | 0.027                | N                               | 0.032                | N                               | 0.013                | N                               | 0.022                |
| M         | 5        | N                               | 0.025                | N                               | 0.029                | N                               | 0.026                | N                               | 0.016                | N                               | 0.021                |
| Y         | 6        | N                               | 0.028                | N                               | 0.039                | N                               | 0.04                 | N                               | 0.023                | N                               | 0.02                 |
| C         | 7        | N                               | 0.024                | N                               | 0.031                | N                               | 0.029                | N                               | 0.015                | N                               | 0.022                |
| Q         | 8        | N                               | 0.035                | N                               | 0.036                | N                               | 0.036                | N                               | 0.062                | N                               | 0.029                |
| L         | 9        | N                               | 0.032                | N                               | 0.023                | N                               | 0.035                | N                               | 0.025                | N                               | 0.023                |
| D         | 10       | N                               | 0.048                | N                               | 0.036                | N                               | 0.035                | N                               | 0.021                | N                               | 0.025                |
| P         | 11       | N                               | 0.035                | N                               | 0.032                | N                               | 0.033                | N                               | 0.044                | N                               | 0.015                |
| S         | 12       | N                               | 0.038                | N                               | 0.042                | N                               | 0.032                | N                               | 0.028                | N                               | 0.017                |
| R         | 13       | N                               | 0.041                | N                               | 0.033                | N                               | 0.035                | N                               | 0.047                | N                               | 0.03                 |
| D         | 14       | N                               | 0.043                | N                               | 0.04                 | N                               | 0.025                | N                               | 0.018                | N                               | 0.029                |
| V         | 15       | N                               | 0.053                | N                               | 0.033                | N                               | 0.044                | N                               | 0.024                | N                               | 0.023                |
| L         | 16       | N                               | 0.037                | N                               | 0.032                | N                               | 0.028                | N                               | 0.026                | N                               | 0.015                |
| C         | 17       | N                               | 0.019                | N                               | 0.03                 | N                               | 0.027                | N                               | 0.034                | N                               | 0.021                |
| L         | 18       | N                               | 0.03                 | N                               | 0.025                | N                               | 0.036                | N                               | 0.039                | N                               | 0.027                |
| R         | 19       | N                               | 0.035                | N                               | 0.028                | N                               | 0.06                 | N                               | 0.023                | N                               | 0.026                |
| P         | 20       | N                               | 0.028                | N                               | 0.033                | N                               | 0.034                | N                               | 0.022                | N                               | 0.089                |
| V         | 21       | N                               | 0.031                | N                               | 0.051                | N                               | 0.034                | N                               | 0.033                | N                               | 0.02                 |
| G         | 22       | N                               | 0.032                | N                               | 0.033                | N                               | 0.04                 | N                               | 0.008                | N                               | 0.018                |
| A         | 23       | N                               | 0.032                | N                               | 0.062                | N                               | 0.034                | N                               | 0.017                | N                               | 0.023                |
| E         | 24       | N                               | 0.041                | N                               | 0.053                | N                               | 0.029                | N                               | 0.022                | N                               | 0.04                 |
| S         | 25       | N                               | 0.032                | N                               | 0.04                 | N                               | 0.035                | N                               | 0.021                | N                               | 0.017                |
| R         | 26       | N                               | 0.038                | N                               | 0.037                | N                               | 0.027                | N                               | 0.035                | N                               | 0.023                |

|   |    |   |       |   |       |   |       |   |       |   |       |
|---|----|---|-------|---|-------|---|-------|---|-------|---|-------|
| G | 27 | N | 0.05  | N | 0.029 | N | 0.03  | N | 0.027 | N | 0.02  |
| R | 28 | N | 0.027 | N | 0.035 | N | 0.027 | N | 0.012 | N | 0.012 |
| P | 29 | N | 0.023 | N | 0.019 | N | 0.024 | N | 0.026 | N | 0.009 |
| L | 30 | N | 0.031 | N | 0.018 | N | 0.031 | N | 0.026 | N | 0.014 |
| S | 31 | N | 0.043 | N | 0.028 | N | 0.033 | N | 0.029 | N | 0.015 |
| G | 32 | N | 0.029 | N | 0.019 | N | 0.041 | N | 0.013 | N | 0.017 |
| P | 33 | N | 0.027 | N | 0.03  | N | 0.047 | N | 0.013 | N | 0.023 |
| L | 34 | N | 0.031 | N | 0.039 | N | 0.046 | N | 0.012 | N | 0.011 |
| G | 35 | N | 0.046 | N | 0.018 | N | 0.022 | N | 0.042 | N | 0.006 |
| T | 36 | N | 0.051 | N | 0.065 | N | 0.026 | N | 0.017 | N | 0.012 |
| L | 37 | N | 0.027 | N | 0.018 | N | 0.026 | N | 0.016 | N | 0.024 |
| S | 38 | N | 0.052 | N | 0.017 | N | 0.039 | N | 0.008 | N | 0.018 |
| S | 39 | N | 0.048 | N | 0.038 | N | 0.043 | N | 0.024 | N | 0.011 |
| P | 40 | N | 0.035 | N | 0.016 | N | 0.028 | N | 0.022 | N | 0.013 |
| S | 41 | N | 0.031 | N | 0.045 | N | 0.063 | N | 0.021 | N | 0.017 |
| P | 42 | N | 0.046 | N | 0.06  | N | 0.031 | N | 0.018 | N | 0.012 |
| S | 43 | N | 0.025 | N | 0.044 | N | 0.027 | N | 0.013 | N | 0.026 |
| A | 44 | N | 0.037 | N | 0.04  | N | 0.027 | N | 0.013 | N | 0.02  |
| V | 45 | N | 0.028 | N | 0.047 | N | 0.03  | N | 0.018 | N | 0.018 |
| P | 46 | N | 0.028 | N | 0.019 | N | 0.032 | N | 0.035 | N | 0.02  |
| A | 47 | N | 0.019 | N | 0.026 | N | 0.024 | N | 0.023 | N | 0.017 |
| D | 48 | N | 0.02  | N | 0.037 | N | 0.025 | N | 0.018 | N | 0.013 |
| H | 49 | N | 0.034 | N | 0.042 | N | 0.033 | N | 0.023 | N | 0.025 |
| G | 50 | N | 0.03  | N | 0.034 | N | 0.028 | N | 0.028 | N | 0.023 |
| A | 51 | N | 0.022 | N | 0.051 | N | 0.026 | N | 0.041 | N | 0.014 |
| H | 52 | N | 0.029 | N | 0.029 | N | 0.026 | N | 0.019 | N | 0.029 |
| L | 53 | N | 0.021 | N | 0.016 | N | 0.027 | N | 0.015 | N | 0.019 |
| S | 54 | N | 0.025 | N | 0.02  | N | 0.035 | N | 0.026 | N | 0.013 |
| L | 55 | N | 0.023 | N | 0.032 | N | 0.028 | N | 0.027 | N | 0.028 |
| R | 56 | N | 0.05  | N | 0.025 | N | 0.082 | N | 0.025 | N | 0.017 |

|   |    |   |       |   |       |   |       |   |       |   |       |
|---|----|---|-------|---|-------|---|-------|---|-------|---|-------|
| G | 57 | B | 0.135 | N | 0.048 | N | 0.055 | N | 0.054 | N | 0.03  |
| L | 58 | N | 0.066 | N | 0.06  | N | 0.055 | N | 0.015 | N | 0.021 |
| P | 59 | N | 0.054 | N | 0.035 | N | 0.038 | N | 0.022 | N | 0.024 |
| V | 60 | N | 0.06  | N | 0.031 | N | 0.044 | N | 0.025 | N | 0.022 |
| C | 61 | N | 0.045 | N | 0.029 | N | 0.031 | N | 0.037 | N | 0.027 |
| A | 62 | N | 0.04  | N | 0.016 | N | 0.035 | N | 0.043 | N | 0.026 |
| F | 63 | N | 0.043 | N | 0.037 | N | 0.025 | N | 0.026 | N | 0.03  |
| S | 64 | N | 0.041 | N | 0.035 | N | 0.041 | N | 0.032 | N | 0.041 |
| S | 65 | N | 0.034 | N | 0.036 | N | 0.039 | N | 0.053 | N | 0.029 |
| A | 66 | N | 0.087 | N | 0.048 | N | 0.06  | N | 0.04  | N | 0.026 |
| G | 67 | N | 0.057 | N | 0.041 | B | 0.236 | N | 0.025 | N | 0.027 |
| P | 68 | N | 0.028 | N | 0.031 | N | 0.044 | N | 0.03  | N | 0.032 |
| C | 69 | N | 0.09  | N | 0.024 | N | 0.071 | N | 0.072 | N | 0.032 |
| A | 70 | N | 0.037 | N | 0.027 | N | 0.034 | N | 0.06  | N | 0.027 |
| L | 71 | N | 0.038 | N | 0.022 | N | 0.034 | N | 0.024 | N | 0.015 |
| R | 72 | N | 0.04  | N | 0.031 | N | 0.041 | N | 0.028 | N | 0.019 |
| F | 73 | N | 0.03  | N | 0.039 | N | 0.043 | N | 0.011 | N | 0.034 |
| T | 74 | N | 0.025 | N | 0.02  | N | 0.052 | N | 0.009 | N | 0.038 |
| S | 75 | N | 0.035 | N | 0.029 | N | 0.058 | N | 0.015 | N | 0.032 |
| A | 76 | N | 0.067 | N | 0.038 | N | 0.05  | N | 0.02  | N | 0.022 |
| R | 77 | N | 0.058 | N | 0.051 | N | 0.083 | N | 0.029 | N | 0.034 |
| C | 78 | N | 0.08  | N | 0.04  | N | 0.037 | N | 0.023 | N | 0.027 |
| M | 79 | N | 0.058 | N | 0.035 | N | 0.035 | N | 0.022 | N | 0.023 |
| E | 80 | N | 0.044 | N | 0.017 | N | 0.03  | N | 0.017 | N | 0.021 |
| T | 81 | N | 0.027 | N | 0.022 | N | 0.045 | N | 0.012 | N | 0.018 |
| T | 82 | N | 0.024 | N | 0.035 | N | 0.023 | N | 0.038 | N | 0.022 |
| V | 83 | N | 0.035 | N | 0.019 | N | 0.028 | N | 0.008 | N | 0.019 |
| N | 84 | N | 0.028 | N | 0.022 | N | 0.054 | N | 0.014 | N | 0.018 |
| A | 85 | N | 0.023 | N | 0.025 | N | 0.032 | N | 0.019 | N | 0.022 |
| H | 86 | N | 0.022 | N | 0.036 | N | 0.031 | N | 0.014 | N | 0.025 |

|   |     |   |       |   |       |   |       |   |       |   |       |
|---|-----|---|-------|---|-------|---|-------|---|-------|---|-------|
| Q | 87  | N | 0.025 | N | 0.03  | N | 0.038 | N | 0.018 | N | 0.021 |
| I | 88  | N | 0.029 | N | 0.02  | N | 0.029 | N | 0.017 | N | 0.017 |
| L | 89  | N | 0.027 | N | 0.024 | N | 0.032 | N | 0.018 | N | 0.022 |
| P | 90  | N | 0.031 | N | 0.026 | N | 0.03  | N | 0.023 | N | 0.016 |
| K | 91  | N | 0.032 | N | 0.025 | N | 0.031 | N | 0.015 | N | 0.022 |
| V | 92  | N | 0.015 | N | 0.017 | N | 0.021 | N | 0.008 | N | 0.02  |
| L | 93  | N | 0.027 | N | 0.022 | N | 0.03  | N | 0.015 | N | 0.02  |
| H | 94  | N | 0.048 | N | 0.06  | N | 0.059 | N | 0.038 | N | 0.02  |
| K | 95  | N | 0.027 | N | 0.034 | N | 0.034 | N | 0.015 | N | 0.018 |
| R | 96  | N | 0.019 | N | 0.018 | B | 0.101 | N | 0.032 | N | 0.015 |
| T | 97  | N | 0.027 | N | 0.046 | N | 0.024 | N | 0.013 | N | 0.011 |
| L | 98  | N | 0.025 | N | 0.019 | N | 0.026 | N | 0.014 | N | 0.014 |
| G | 99  | N | 0.037 | N | 0.035 | N | 0.032 | N | 0.033 | N | 0.014 |
| L | 100 | N | 0.028 | N | 0.029 | N | 0.04  | N | 0.017 | N | 0.021 |
| P | 101 | N | 0.027 | N | 0.022 | N | 0.034 | N | 0.017 | N | 0.022 |
| A | 102 | N | 0.027 | N | 0.022 | N | 0.037 | N | 0.009 | N | 0.024 |
| M | 103 | N | 0.023 | N | 0.032 | N | 0.036 | N | 0.008 | N | 0.026 |
| S | 104 | N | 0.046 | N | 0.03  | N | 0.025 | N | 0.011 | N | 0.055 |
| T | 105 | N | 0.087 | N | 0.028 | N | 0.031 | N | 0.008 | N | 0.041 |
| T | 106 | N | 0.03  | N | 0.018 | N | 0.029 | N | 0.01  | B | 0.117 |
| D | 107 | N | 0.02  | N | 0.014 | N | 0.025 | N | 0.009 | N | 0.054 |
| L | 108 | N | 0.03  | N | 0.015 | N | 0.018 | N | 0.027 | N | 0.02  |
| E | 109 | N | 0.018 | N | 0.022 | N | 0.019 | N | 0.021 | N | 0.021 |
| A | 110 | N | 0.023 | N | 0.03  | N | 0.024 | N | 0.021 | N | 0.015 |
| Y | 111 | N | 0.025 | N | 0.043 | N | 0.029 | N | 0.01  | N | 0.023 |
| F | 112 | N | 0.066 | N | 0.034 | N | 0.022 | N | 0.013 | N | 0.022 |
| K | 113 | N | 0.017 | N | 0.025 | N | 0.022 | N | 0.023 | N | 0.022 |
| D | 114 | N | 0.03  | N | 0.038 | N | 0.03  | N | 0.027 | N | 0.021 |
| C | 115 | N | 0.039 | N | 0.035 | N | 0.028 | N | 0.011 | N | 0.021 |
| V | 116 | N | 0.043 | N | 0.032 | N | 0.034 | N | 0.026 | N | 0.021 |

|          |            |          |              |          |              |          |             |          |              |          |             |
|----------|------------|----------|--------------|----------|--------------|----------|-------------|----------|--------------|----------|-------------|
| F        | 117        | N        | 0.038        | N        | 0.051        | N        | 0.029       | N        | 0.023        | N        | 0.022       |
| K        | 118        | N        | 0.032        | N        | 0.038        | N        | 0.033       | N        | 0.029        | N        | 0.022       |
| D        | 119        | N        | 0.037        | N        | 0.032        | N        | 0.03        | N        | 0.019        | N        | 0.016       |
| W        | 120        | N        | 0.033        | N        | 0.037        | N        | 0.03        | N        | 0.024        | N        | 0.022       |
| E        | 121        | N        | 0.032        | N        | 0.018        | N        | 0.036       | N        | 0.024        | N        | 0.022       |
| E        | 122        | N        | 0.031        | N        | 0.023        | N        | 0.03        | N        | 0.02         | N        | 0.02        |
| L        | 123        | N        | 0.035        | N        | 0.029        | N        | 0.031       | N        | 0.032        | N        | 0.02        |
| G        | 124        | N        | 0.034        | N        | 0.043        | N        | 0.027       | N        | 0.024        | N        | 0.018       |
| E        | 125        | N        | 0.028        | N        | 0.031        | N        | 0.024       | N        | 0.021        | N        | 0.019       |
| E        | 126        | N        | 0.032        | N        | 0.022        | N        | 0.023       | N        | 0.022        | N        | 0.018       |
| I        | 127        | N        | 0.018        | N        | 0.021        | N        | 0.033       | N        | 0.018        | N        | 0.018       |
| R        | 128        | N        | 0.051        | N        | 0.099        | N        | 0.029       | N        | 0.019        | N        | 0.021       |
| L        | 129        | N        | 0.031        | N        | 0.025        | N        | 0.032       | N        | 0.02         | N        | 0.019       |
| <b>K</b> | <b>130</b> | <b>N</b> | <b>0.025</b> | <b>N</b> | <b>0.038</b> | <b>N</b> | <b>0.03</b> | <b>N</b> | <b>0.021</b> | <b>N</b> | <b>0.02</b> |
| V        | 131        | N        | 0.019        | N        | 0.031        | N        | 0.031       | N        | 0.016        | N        | 0.018       |
| F        | 132        | N        | 0.031        | N        | 0.062        | N        | 0.035       | N        | 0.023        | N        | 0.021       |
| V        | 133        | N        | 0.024        | N        | 0.03         | N        | 0.027       | N        | 0.016        | N        | 0.028       |
| L        | 134        | N        | 0.054        | N        | 0.033        | N        | 0.036       | N        | 0.012        | N        | 0.022       |
| G        | 135        | B        | 0.283        | N        | 0.041        | N        | 0.059       | N        | 0.024        | N        | 0.028       |
| G        | 136        | B        | 0.394        | N        | 0.03         | B        | 0.151       | N        | 0.026        | N        | 0.033       |
| C        | 137        | B        | 0.179        | N        | 0.035        | N        | 0.046       | N        | 0.05         | N        | 0.031       |
| R        | 138        | N        | 0.073        | N        | 0.026        | N        | 0.036       | N        | 0.031        | N        | 0.033       |
| H        | 139        | N        | 0.097        | N        | 0.048        | N        | 0.031       | N        | 0.023        | N        | 0.062       |
| K        | 140        | N        | 0.048        | N        | 0.052        | N        | 0.03        | N        | 0.029        | N        | 0.029       |
| L        | 141        | N        | 0.033        | N        | 0.031        | N        | 0.026       | N        | 0.034        | N        | 0.02        |
| V        | 142        | N        | 0.032        | N        | 0.034        | N        | 0.028       | N        | 0.037        | N        | 0.015       |
| C        | 143        | N        | 0.018        | N        | 0.028        | N        | 0.045       | N        | 0.029        | N        | 0.026       |
| A        | 144        | N        | 0.026        | N        | 0.013        | N        | 0.033       | N        | 0.024        | N        | 0.023       |
| P        | 145        | N        | 0.054        | N        | 0.072        | N        | 0.042       | N        | 0.043        | N        | 0.021       |
| A        | 146        | N        | 0.036        | N        | 0.042        | N        | 0.033       | N        | 0.033        | N        | 0.018       |

|   |     |   |       |   |       |   |       |   |       |   |       |
|---|-----|---|-------|---|-------|---|-------|---|-------|---|-------|
| P | 147 | N | 0.033 | N | 0.034 | N | 0.04  | N | 0.03  | N | 0.041 |
| C | 148 | N | 0.073 | N | 0.024 | N | 0.041 | N | 0.051 | N | 0.028 |
| N | 149 | N | 0.042 | N | 0.036 | N | 0.035 | N | 0.03  | N | 0.032 |
| F | 150 | N | 0.065 | N | 0.054 | N | 0.03  | N | 0.042 | N | 0.038 |
| F | 151 | N | 0.044 | N | 0.032 | N | 0.051 | N | 0.031 | N | 0.033 |
| T | 152 | N | 0.038 | N | 0.025 | N | 0.032 | N | 0.007 | N | 0.024 |
| S | 153 | N | 0.038 | N | 0.029 | N | 0.031 | N | 0.022 | N | 0.021 |
| A | 154 | N | 0.03  | N | 0.035 | N | 0.033 | N | 0.027 | N | 0.016 |

**Table S3.** Purity of MBP-HBx variants as estimated by using the mass spectrometry emPAI values.

| Variant     | Average Purity<br>(% Fusion) |
|-------------|------------------------------|
| G136A       | 83.3                         |
| K130A       | 76.7                         |
| K130A/K140A | 83.3                         |
| K140A       | 77.7                         |
| C137A       | 75.9                         |
| H139A       | 79.5                         |
| K130M       | 80.5                         |
| K130M/V131I | 80.9                         |
| $\Delta 27$ | 85.2                         |



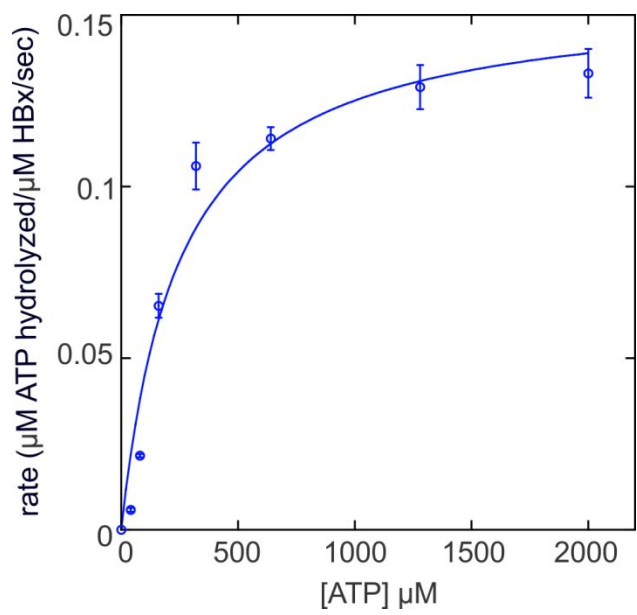

**Figure S1.** Michaelis-Menten kinetics of purified GroEL. From this fit,  $K_M$  and  $k_{cat}$  values were determined to be  $255 \pm 14 \mu\text{M}$  and  $0.15 \pm 0.007 \text{ s}^{-1}$  respectively. Error bars indicated standard error.

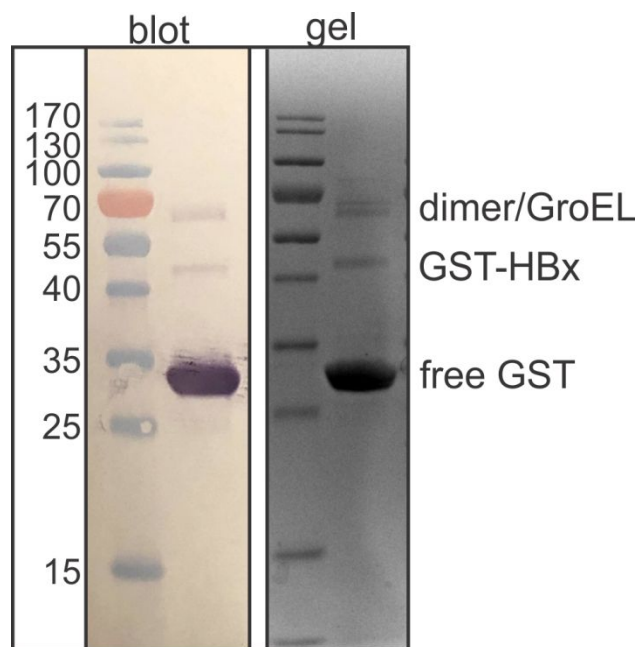

**Figure S2.** Western Blot and SDS-PAGE analysis of GST-HBx. Western blot was performed on a GST-HBx sample using His<sub>6</sub>-antibody. Bands of approximate molecular weights of 60, 44 and 27 kDa efficiently bind the His-antibody (AbCam, ab49746) indicating that free GST in the sample is a result of proteolytic degradation of the GST-HBx fusion protein. This GST readily forms dimer species at a similar apparent molecular weight as GroEL (i.e. 60 kDa). Mass-spectrometric analysis indicate that the gel band at ~60 kDa is composed of this dimer as well as GroEL contaminant and perhaps minimal amounts of GST-HBx/HBx dimer.

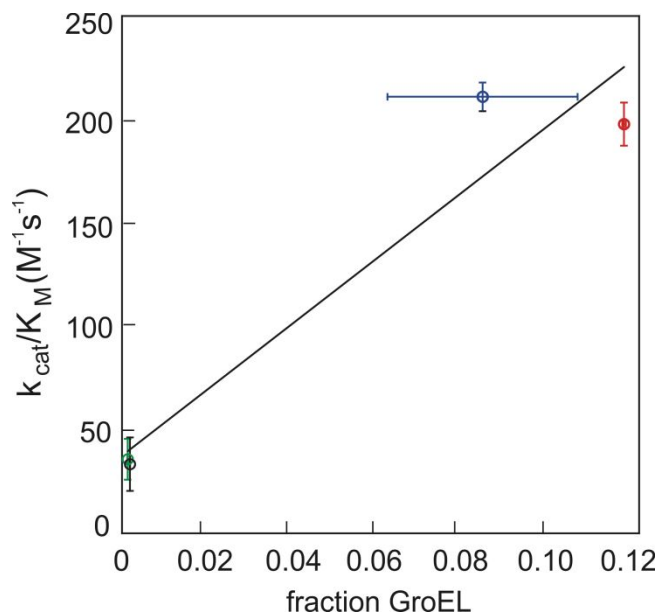

**Figure S3.** Correlation between the amount of GroEL and activity. MBP-HBx and GST-HBx samples containing GroEL are represented in red and blue, respectively. DsbC-HBx and NusA-HBx samples lacking the chaperone are shown in green and black, respectively. Vertical error bars indicate standard error in activity ( $k_{cat}/K_M$  values), while horizontal error bars indicate the variability of copurifying GroEL between individual samples (represented as standard error).
